# Supplementary material
Source: publisher site journal article supplement (http://www.kjim.org/upload/media/kjim-2017-174-suppl2.pdf)
Supplement: Supplementary file 1 [file kjim-2017-174-suppl2.pdf]

**Supplementary Table 2. Univariate analysis for medical costs during the first 3 years after achieving complete response in patients who received regular follow-up PET-CT and who did not (n = 77)**

| Subjects                                  | PET-CT (-) (n = 42)             | PET-CT (+) (n = 35)              | p value |
|-------------------------------------------|---------------------------------|----------------------------------|---------|
| Duration of follow-up, mon                | 28 (3-36)                       | 36 (6-36)                        | < 0.001 |
| Relapse                                   | 3 (7.1)                         | 6 (17.1)                         | 0.286   |
| Outpatient visits                         |                                 |                                  |         |
| No. of visits                             | 14 (4-103)                      | 26 (6-56)                        | 0.003   |
| Costs                                     | 2,256,327 (214,178-38,923,231)  | 5,443,348 (1,021,569-7,646,772)  | 0.061   |
| Hospitalization                           |                                 |                                  |         |
| No. of hospitalization                    | 0 (0-15)                        | 0 (0-7)                          | 0.624   |
| Costs                                     | 0 (0-91,291,439)                | 0 (0-32,311,317)                 | 0.260   |
| Total costs                               | 2,499,689 (340,094-130,214,670) | 5,624,649 (2,005,402-39,468,247) | 0.690   |
| Total costs paid by patients <sup>a</sup> | 326,819 (64,540-108,837,381)    | 709,808 (176,823-4,938,925)      | 0.405   |

Values are presented as median (range) or number (%). Statistical significance test was done by independent *t* test.

PET-CT, positron emission tomography-computed tomography.

<sup>a</sup>Costs that were not reimbursed by the National Health Insurance Service; thus, paid by the patients. Costs are stated in Korean won.
